# Supplementary material for: Effect of the Glucagon-Like Peptide-1 Receptor Agonists on Autonomic Function in Subjects with Diabetes: A Systematic Review and Meta-Analysis
Source: PubMed Central journal article supplement — Diabetes Metab J. 2022 Apr 12;46(6):901–11. doi: 10.4093/dmj.2021.0314 (PMC9723196; doi:10.4093/dmj.2021.0314), 2022-04-12
Supplement: dmj-2021-0314-suppl2.pdf [file dmj-2021-0314-suppl2.pdf]

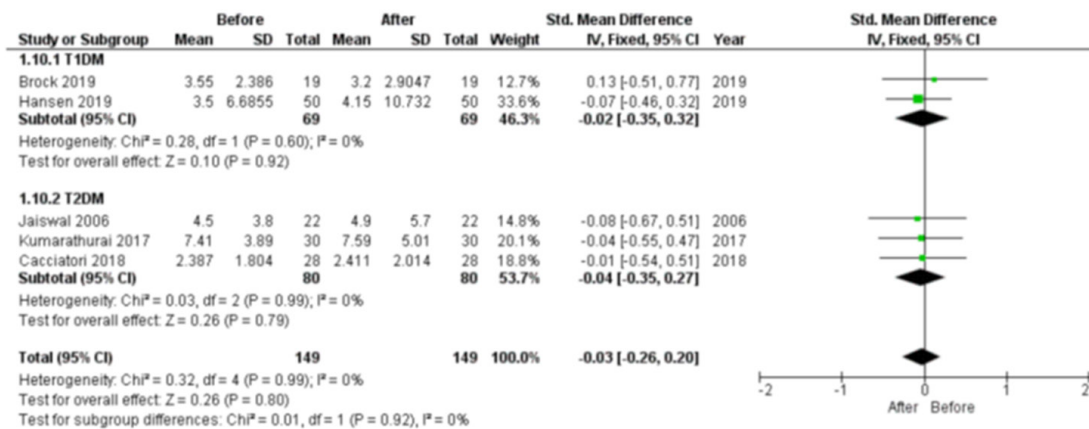

**Supplementary Fig. 1.** Low frequency/high frequency (LF/HF) ratio standard mean difference after the glucagon-like peptide 1 receptor chronic administration, dividing studies on the basis of the type of diabetes considered (standard mean difference, -0.03; 95% confidence interval [CI], -0.26 to 0.20; I<sup>2</sup>=0%; P=0.080). SD, standard deviation; IV, inverse variance; T1DM, type 1 diabetes mellitus; T2DM, type 2 diabetes mellitus.

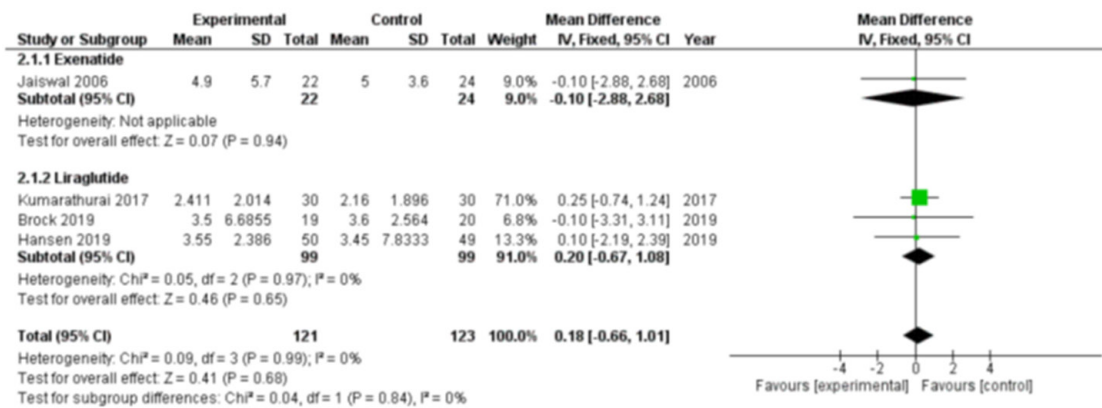

**Supplementary Fig. 2.** Low frequency/high frequency (LF/HF) ratio difference after the glucagon-like peptide 1 receptor chronic administration comparing study and control groups. Comparing study and control groups, no differences in the LF/HF ratio after treatment were observed (mean difference, 0.18; 95% confidence interval [CI], -0.66 to 1.01; I<sup>2</sup>=0%; P=0.680). SD, standard deviation; IV, inverse variance.
