# Supplementary material for: Effect of the Glucagon-Like Peptide-1 Receptor Agonists on Autonomic Function in Subjects with Diabetes: A Systematic Review and Meta-Analysis
Source: PubMed Central journal article supplement — Diabetes Metab J. 2022 Apr 12;46(6):901–11. doi: 10.4093/dmj.2021.0314 (PMC9723196; doi:10.4093/dmj.2021.0314), 2022-04-12
Supplement: dmj-2021-0314-suppl3.pdf [file dmj-2021-0314-suppl3.pdf]

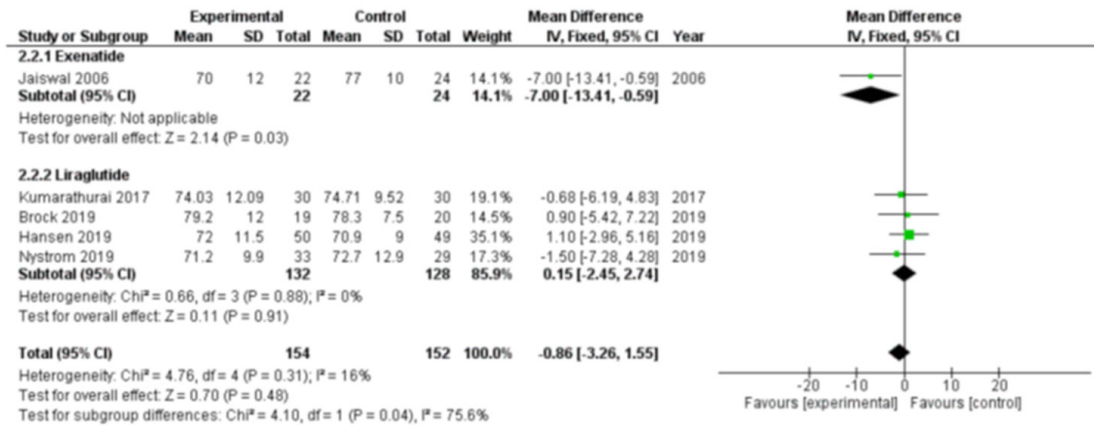

**Supplementary Fig. 3.** Heart rate (HR) mean difference after the glucagon-like peptide 1 receptor chronic administration comparing study and control groups. HR was not significantly different between study and control groups (mean difference,  $-0.86$ ; 95% confidence interval [CI],  $-3.26$  to  $1.55$ ;  $I^2 = 16\%$ ;  $P = 0.480$ ) in five of the six studies. SD, standard deviation; IV, inverse variance.

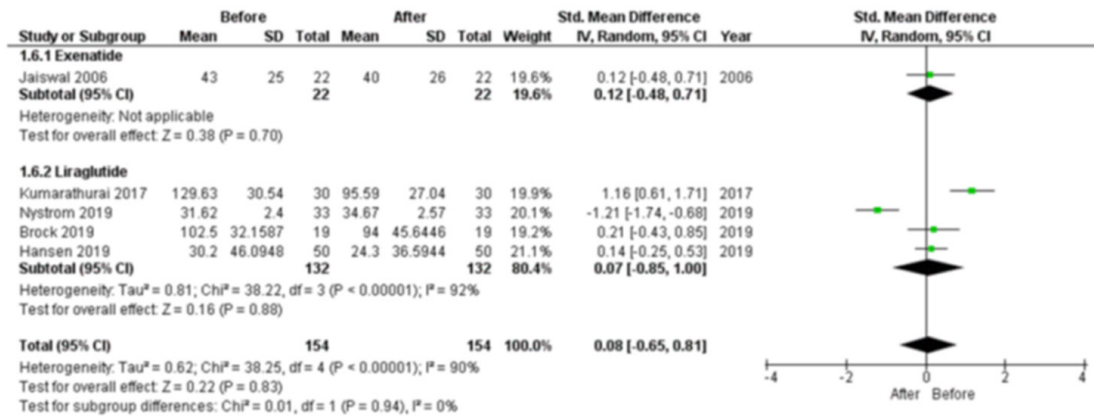

**Supplementary Fig. 4.** Standard deviations of RR interval (SDNN) mean difference considering before and after the glucagon-like peptide 1 receptor chronic administration. After chronic treatment, SDNN did not significantly change (standard mean difference,  $0.08$ ; 95% confidence interval [CI],  $-0.65$  to  $0.81$ ;  $P = 0.830$ ). SD, standard deviation; IV, inverse variance.
