# Supplementary material for: Effect of the Glucagon-Like Peptide-1 Receptor Agonists on Autonomic Function in Subjects with Diabetes: A Systematic Review and Meta-Analysis
Source: PubMed Central journal article supplement — Diabetes Metab J. 2022 Apr 12;46(6):901–11. doi: 10.4093/dmj.2021.0314 (PMC9723196; doi:10.4093/dmj.2021.0314), 2022-04-12
Supplement: dmj-2021-0314-suppl4.pdf [file dmj-2021-0314-suppl4.pdf]

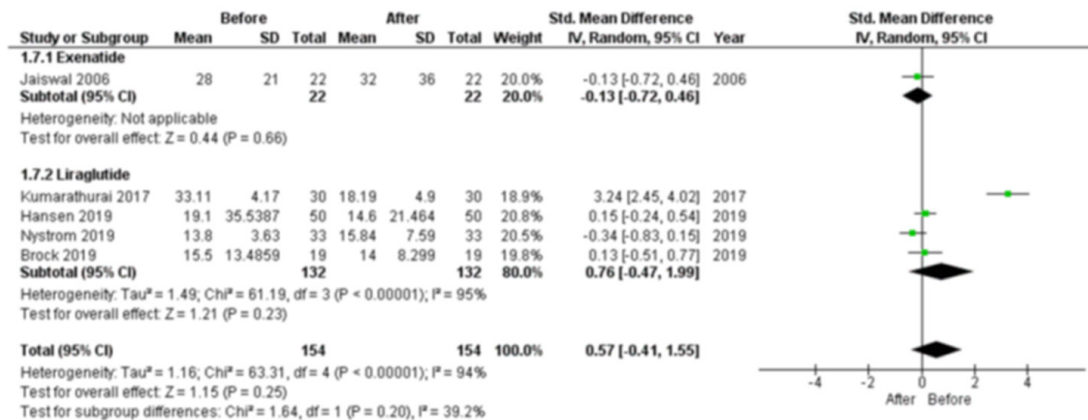

**Supplementary Fig. 5.** Square root of the mean squared difference of successive RR interval (RSMSSD) standard mean difference considering before and after the glucagon-like peptide 1 receptor chronic administration. RSMSSD value documented no difference after treatment (standard mean difference, 0.57; 95% confidence interval [CI], -0.41 to 1.55; I<sup>2</sup> = 94%; P = 0.250). SD, standard deviation; IV, inverse variance.

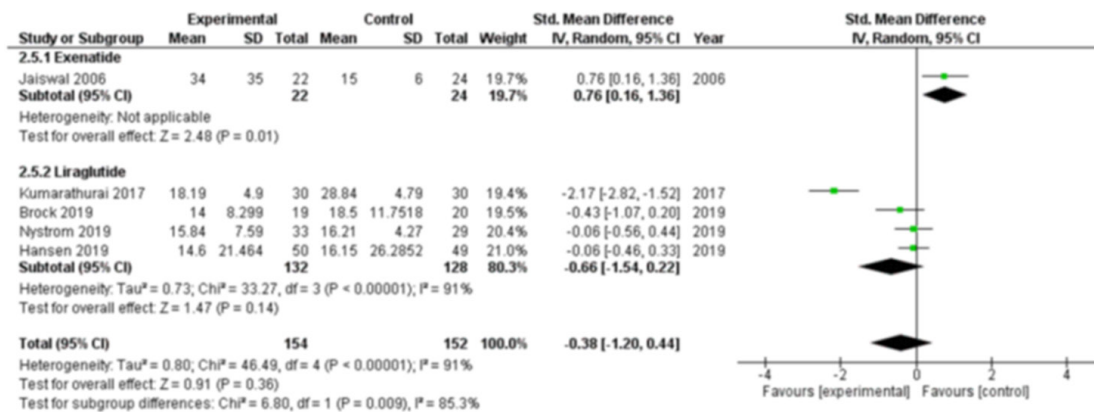

**Supplementary Fig. 6.** Square root of the mean squared difference of successive RR interval (RSMSSD) standard mean difference after the glucagon-like peptide 1 receptor chronic administration comparing study and control groups. RSMSSD value documented no difference between study and control groups (standard mean difference, -0.38; 95% confidence interval [CI], -1.20 to 0.44; P = 0.360). SD, standard deviation; IV, inverse variance.
