# Supplementary material for: Effect of the Glucagon-Like Peptide-1 Receptor Agonists on Autonomic Function in Subjects with Diabetes: A Systematic Review and Meta-Analysis
Source: PubMed Central journal article supplement — Diabetes Metab J. 2022 Apr 12;46(6):901–11. doi: 10.4093/dmj.2021.0314 (PMC9723196; doi:10.4093/dmj.2021.0314), 2022-04-12
Supplement: dmj-2021-0314-suppl5.pdf [file dmj-2021-0314-suppl5.pdf]

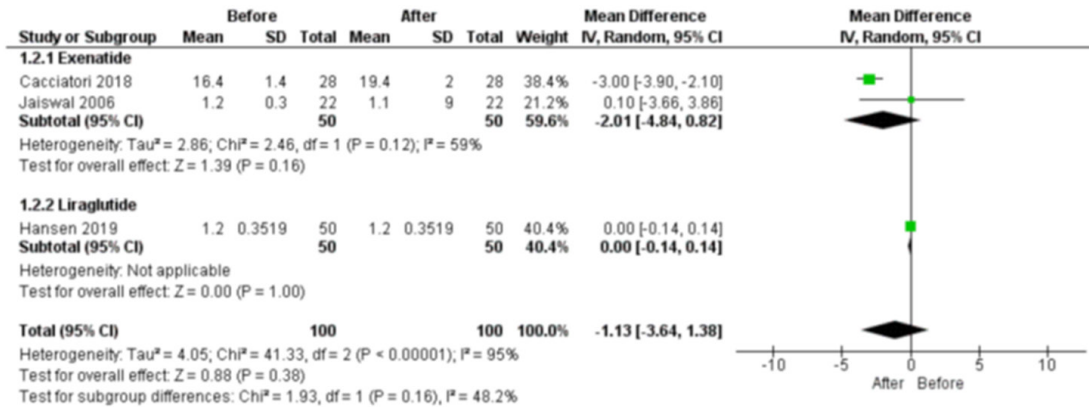

**Supplementary Fig. 7.** Expiration/inspiration (E/I) ratio mean difference before and after treatment. No changes in E/I ratio after glucagon-like peptide 1 receptor chronic agonist administration (mean difference, -1.13; 95% confidence interval [CI], -3.64 to 1.38; I<sup>2</sup> = 95%; P = 0.380). SD, standard deviation; IV, inverse variance.

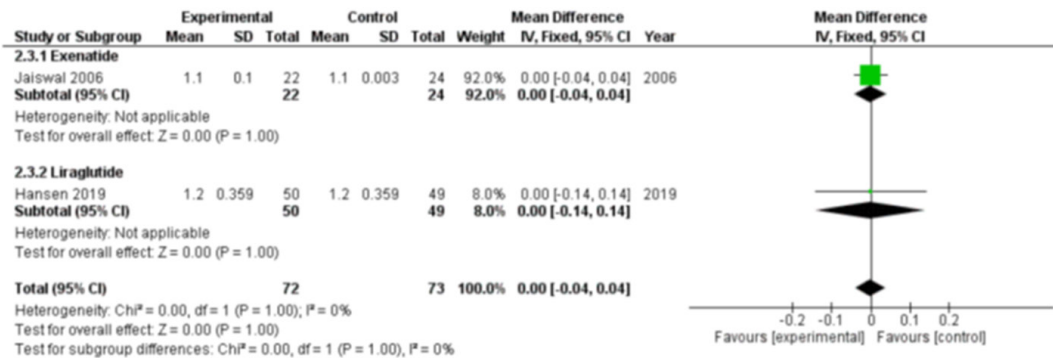

**Supplementary Fig. 8.** Expiration/inspiration (E/I) ratio difference after the glucagon-like peptide 1 receptor chronic administration comparing study and control groups. In the study vs. control group comparison, the E/I ratio was not significantly different (mean difference, 0.0; 95% confidence interval [CI], -0.004 to 0.004; P = 0.999). SD, standard deviation; IV, inverse variance.
