# Supplementary material for: Effect of the Glucagon-Like Peptide-1 Receptor Agonists on Autonomic Function in Subjects with Diabetes: A Systematic Review and Meta-Analysis
Source: PubMed Central journal article supplement — Diabetes Metab J. 2022 Apr 12;46(6):901–11. doi: 10.4093/dmj.2021.0314 (PMC9723196; doi:10.4093/dmj.2021.0314), 2022-04-12
Supplement: dmj-2021-0314-suppl6.pdf [file dmj-2021-0314-suppl6.pdf]

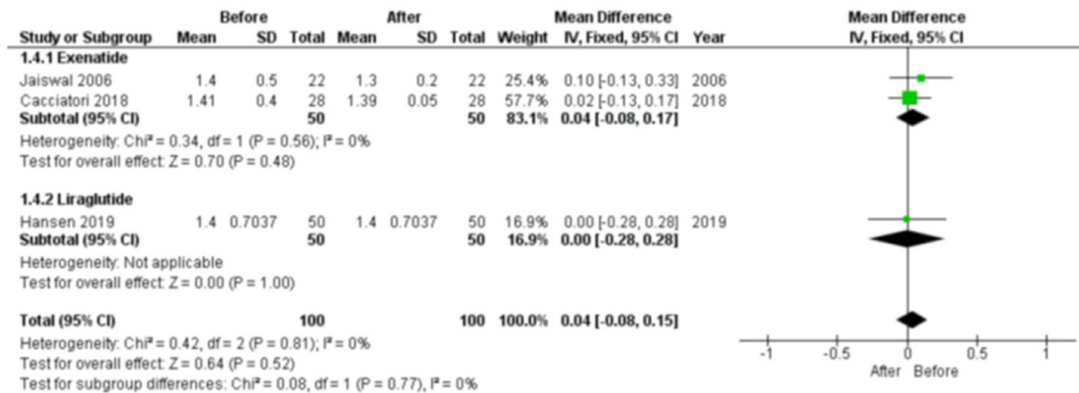

**Supplementary Fig. 9.** Valsalva manoeuvre (VM) mean difference considering before and after the glucagon-like peptide 1 receptor chronic administration. No significantly changes in VM value after treatment (mean difference, 0.04; 95% confidence interval [CI], -0.08 to 0.15;  $P=0.520$ ). SD, standard deviation; IV, inverse variance.

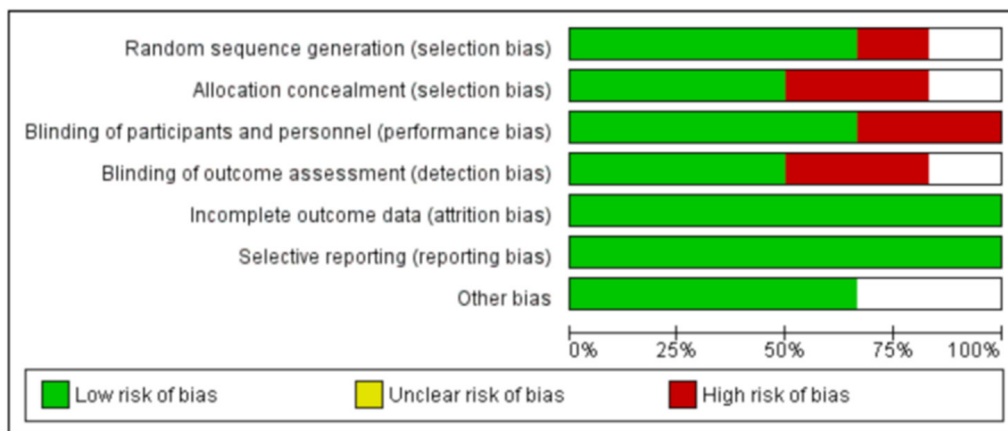

**Supplementary Fig. 10.** Risk of bias graph. Evaluation of the risk of bias showed a good quality of the studies, in terms of reporting and incomplete biases. On the contrary, a variable quality in terms of blinding was detected.
